# Supplementary material
Source: PubMed Central journal article supplement (PMC9559912)
Supplement: mmc1.pdf [file mmc1.pdf]

***Supplemental Table 1: Antibodies used for flow cytometry***

| <b>Target</b> | <b>Clone</b> | <b>Catalog</b> | <b>Fluorochrome</b> | <b>Manufacturer</b>      |
|---------------|--------------|----------------|---------------------|--------------------------|
| CD45          | HI30         | 563717         | BV650               | BD Biosciences           |
| CD3           | UCHT1        | 48-0038-42     | eF450               | Thermo Fisher Scientific |
| CD4           | RPA-T4       | 45-0049-42     | PerCP-Cy5.5         | Thermo Fisher Scientific |
| CD8           | HIT8a        | 555634         | FITC                | BD Biosciences           |
| CD19          | HIB19        | 302212         | APC                 | BioLegend                |
