# Supplementary material
Source: PubMed Central journal article supplement (PMC9559912)
Supplement: mmc2.pdf [file mmc2.pdf]

**Supplemental Table 2: Quality Control Metrics of Single Cell RNA Sequencing**

| Patient | Tissue | Estimated Number of Cells | Mean Reads per Cell | Median Genes per Cell | Number of Reads | Valid Barcodes |
|---------|--------|---------------------------|---------------------|-----------------------|-----------------|----------------|
| UV031   | eye    | 1,903                     | 399,252             | 2,191                 | 759,777,394     | 88.60%         |
| UV031   | PBMC   | 7,156                     | 68,629              | 1,550                 | 491,109,429     | 90.20%         |
| UV150   | eye    | 4,606                     | 105,201             | 1,635                 | 484,559,710     | 91.50%         |
| UV150   | PBMC   | 5,957                     | 83,144              | 1,766                 | 495,289,818     | 91.20%         |
| UV170   | eye    | 2,828                     | 147,433             | 1,514                 | 416,941,452     | 92.20%         |
| UV170   | PBMC   | 6,871                     | 71,363              | 1,613                 | 490,339,201     | 91.50%         |
| UV174   | eye    | 1,786                     | 158,534             | 1,629                 | 283,142,294     | 93.20%         |
| UV174   | PBMC   | 5,762                     | 67,863              | 1,708                 | 391,026,903     | 90.80%         |

  

| Patient | Tissue | Sequencing Saturation | Q30 Bases in Barcode | Q30 Bases in RNA Read | Q30 Bases in RNA Read 2 | Q30 Bases in UMI |
|---------|--------|-----------------------|----------------------|-----------------------|-------------------------|------------------|
| UV031   | eye    | 95.10%                | 95.40%               | 93.30%                | 91.40%                  | 94.80%           |
| UV031   | PBMC   | 87.80%                | 94.40%               | 87.20%                | 89.30%                  | 93.90%           |
| UV150   | eye    | 90.20%                | 94.20%               | 87.00%                | 88.40%                  | 93.70%           |
| UV150   | PBMC   | 88.20%                | 94.30%               | 87.10%                | 88.60%                  | 93.90%           |
| UV170   | eye    | 93.70%                | 96.90%               | 85.30%                | 92.70%                  | 96.50%           |
| UV170   | PBMC   | 87.70%                | 96.90%               | 88.30%                | 91.50%                  | 96.60%           |
| UV174   | eye    | 90.90%                | 97.00%               | 88.60%                | 92.30%                  | 96.70%           |
| UV174   | PBMC   | 84.80%                | 96.90%               | 88.40%                | 92.70%                  | 96.60%           |

  

| Patient | Tissue | Reads Mapped to Genome | Reads Mapped Confidently to Genome | Reads Mapped Confidently to Intergenic Regions | Reads Mapped Confidently to Intronic Regions | Reads Mapped Confidently to Exonic Regions |
|---------|--------|------------------------|------------------------------------|------------------------------------------------|----------------------------------------------|--------------------------------------------|
| UV031   | eye    | 91.10%                 | 78.10%                             | 7.20%                                          | 11.80%                                       | 61.60%                                     |
| UV031   | PBMC   | 91.50%                 | 82.80%                             | 6.30%                                          | 7.60%                                        | 70.80%                                     |
| UV150   | eye    | 91.20%                 | 84.10%                             | 5.50%                                          | 6.30%                                        | 74.40%                                     |
| UV150   | PBMC   | 91.40%                 | 83.80%                             | 5.60%                                          | 6.70%                                        | 73.70%                                     |
| UV170   | eye    | 91.70%                 | 86.00%                             | 5.90%                                          | 6.00%                                        | 76.10%                                     |
| UV170   | PBMC   | 90.70%                 | 83.40%                             | 5.60%                                          | 6.80%                                        | 73.40%                                     |
| UV174   | eye    | 91.40%                 | 86.80%                             | 4.90%                                          | 6.00%                                        | 77.80%                                     |
| UV174   | PBMC   | 90.90%                 | 83.00%                             | 5.90%                                          | 6.80%                                        | 72.20%                                     |

  

| Patient | Tissue | Reads Mapped Confidently to Transcriptome | Reads Mapped Antisense to Gene | Fraction Reads in Cells | Total Genes Detected | Median UMI Counts per Cell |
|---------|--------|-------------------------------------------|--------------------------------|-------------------------|----------------------|----------------------------|
| UV031   | eye    | 54.00%                                    | 5.40%                          | 90.50%                  | 19,697               | 6,068                      |
| UV031   | PBMC   | 64.50%                                    | 3.50%                          | 96.90%                  | 20,078               | 4,426                      |
| UV150   | eye    | 69.00%                                    | 3.00%                          | 94.30%                  | 19,126               | 4,693                      |
| UV150   | PBMC   | 68.00%                                    | 3.30%                          | 97.20%                  | 19,955               | 5,514                      |
| UV170   | eye    | 71.30%                                    | 2.60%                          | 93.80%                  | 18,177               | 4,181                      |
| UV170   | PBMC   | 68.20%                                    | 3.10%                          | 95.40%                  | 20,081               | 4,781                      |
| UV174   | eye    | 72.90%                                    | 2.50%                          | 93.90%                  | 18,022               | 5,084                      |
| UV174   | PBMC   | 66.70%                                    | 3.10%                          | 94.60%                  | 19,824               | 5,650                      |
