# Supplementary material
Source: PubMed Central journal article supplement (PMC9559912)
Supplement: mmc3.pdf [file mmc3.pdf]

**Supplemental Table 3: T Cell Gene Sets**

| CD4 Naive | CD4 Memory | TH1      | TH17   | Treg   | CD4 RA (PD-1hi) | CD4 Chronic Ag |
|-----------|------------|----------|--------|--------|-----------------|----------------|
| BACH2     | SPIC       | SMAD3    | RORC   | PMCH   | PDCD1           | IKZF2          |
| FOXP1     | KLF6       | RASGRF2  | HLF    | CD7    | TOX             | EOMES          |
| MYC       | VGLL4      | STOM     | CCR6   | SKAP1  | ITM2A           | MAF            |
|           | JUNB       | YARS     | ADAM12 | SIT1   | TIGIT           | PRDM1          |
|           | JUN        | TBX21    | PTPN13 | CD5    | MAF             | PAWR           |
|           | ARNTL      | LYAR     | NR1D1  | IFI44L | CST7            | JAZF1          |
|           |            | CBLB     | CTSH   | LAIR2  | SCO2            | NAB1           |
|           |            | KIAA0182 | AQP3   | FOXP3  | CDCA7           | NFATC1         |
|           |            | HCG18    | CRY1   | CD70   | RAB37           | ZBTB32         |
|           |            | CXCR3    | S100A4 | TYR    | ICA1            | KLF4           |
|           |            |          |        |        |                 | MCM6           |
|           |            |          |        |        |                 | TSHZ2          |
|           |            |          |        |        |                 | SAP30          |
|           |            |          |        |        |                 | BAZ1A          |
|           |            |          |        |        |                 | NFAT5          |
|           |            |          |        |        |                 | MDFIC          |
|           |            |          |        |        |                 | PBX3           |

Reference  
 CD4 Naive Crawford et al. Immunity 2014 PMID: 24530057  
 CD4 Memory Crawford et al. Immunity 2014 PMID: 24530057  
 TH1 GSE56179\_TH1\_VS\_TH2/TH17\_UP - Top 10 DEGs (Arlehamn et al J. Immunol 2014 PMID: 25092889)  
 TH17 GSE56179\_TH17\_VS\_TH1/TH2\_UP - Top 10 DEGs (Arlehamn et al J. Immunol 2014 PMID: 25092889)  
 Treg \*Newman AM et al Nat Methods 2016 PMID: 25822800  
 CD4 RA (PD-1hi) Rao DA et al Nature 2017 PMID: 28150777 (Peripheral Helper)  
 Direct Ag Stim GSE13738\_TCR\_VS\_BYSTANDER\_ACTIVATED\_CD4\_TCELL\_UP  
 CD4 Chronic , Crawford et al. Immunity 2014 PMID: 24530057

\*We selected a gene set of the top 10 most abundantly expressed genes that were differentially expressed between Tregs and other type of CD4 T cells.

**Direct Ag Stimulated**

|         |          |           |         |           |        |         |          |          |         |
|---------|----------|-----------|---------|-----------|--------|---------|----------|----------|---------|
| ACADM   | BTBD11   | COL6A3    | EGR1    | HIBADH    | MCTP2  | NRAS    | QSOX2    | SLC25A44 | TCEA2   |
| ACSL3   | BTBD3    | COX10     | ELP5    | HMG20A    | MGST2  | NREP    | RAB27A   | SLC35G2  | TENT4B  |
| ADAT2   | C2orf76  | COX15     | ETS2    | HSD17B6   | MOB1B  | NT5C2   | RAB33A   | SLC39A14 | TMEM135 |
| AGPAT5  | CACNA2D4 | CPPED1    | ETV6    | IFT27     | MOK    | NTRK1   | RCL1     | SLC5A3   | TNIP3   |
| AHCYL2  | CASP9    | CPSF6     | FAM210A | IFT74     | MPP1   | OSBP2   | RGL4     | SLC7A5   | TPRG1   |
| AIF1    | CCDC51   | CREB3L4   | FASLG   | ILDR2     | MPZL1  | PALLD   | RGS3     | SLC9B2   | TRAK1   |
| AP2B1   | CCKAR    | CTTN      | FASN    | IMPAD1    | MRPS15 | PAQR6   | RHOBTB3  | SOCS6    | TRIM25  |
| APOLD1  | CCR7     | CXCL13    | FDX1    | INTS6L    | MRPS6  | PDE7B   | RNASEH2B | SOX4     | TXNDC17 |
| ARHGFE2 | CD2      | DBN1      | FGGY    | ITCH      | MYB    | PDGFA   | RPAP2    | SPA17    | UBE2G1  |
| ARHGFE6 | CD200    | DECR1     | GEM     | ITGAE     | MYEF2  | PI4K2A  | RPRD2    | SPON2    | UBE2V2  |
| ARHGFE7 | CD27     | DENR      | GFI1    | KCNK5     | MYO7B  | PMS1    | RUBCNL   | SPRY1    | VAMP1   |
| ASCC1   | CD38     | DHCR24    | GFOD1   | KYAT3     | NAB1   | PPA1    | SEC11A   | SPTBN1   | VNN2    |
| ATP8A1  | CDK5     | DHTKD1    | GK      | LANCL2    | NBAS   | PPP2R5A | SEC31B   | SQLE     | VPS8    |
| ATP8B3  | CENPV    | DIXDC1    | GNA12   | LASP1     | NDFIP2 | PRF1    | SELL     | SSBP2    | VWA5A   |
| B3GNT5  | CHMP5    | DLEU1     | GRAMD4  | LAT2      | NEMP2  | PRPF6   | SERPINB1 | STAG3    | YES1    |
| B3GNTL1 | CHRNA6   | DNAH14    | GRK3    | LINC01281 | NFATC3 | PTDSS1  | SIAH2    | STAMBP   | YWHAQ   |
| BABAM2  | CHSY1    | DUS2      | GRK4    | LINC01588 | NHS    | PTGFRN  | SIRPG    | STK26    | ZFYVE1  |
| BATF3   | CLDN12   | DYNLL1    | GSTO2   | LRRCC1    | NME7   | PTPN14  | SLC12A6  | STMP1    | ZSCAN30 |
| BEND5   | CLTC     | EEF1AKNMT | GZMH    | MAPRE2    | NOA1   | PTPN3   | SLC15A4  | SUOX     |         |
| BSPRY   | CNIH1    | EFL1      | HDC     | MCCC2     | NR5A2  | PXYLP1  | SLC16A5  | TARBP1   |         |
