# Supplementary material
Source: PubMed Central journal article supplement (PMC9559912)
Supplement: mmc4.pdf [file mmc4.pdf]

**Supplemental Table 4: B Cell Gene Sets**

| Naive B cells | Autoimmune B cell | Memory B cells | plasma cells | RA autoimmune B cell | RA plasmablast | RA FCRL4+    |
|---------------|-------------------|----------------|--------------|----------------------|----------------|--------------|
| CD1B          | ITGAX             | GPR183         | SPAG4        | ITGAX                | MZB1           | FCRL4        |
| ABCB4         | TBX21             | SLC15A3        | MZB1         | ZEB2                 | XBP1           | GPR82        |
| TCL1A         | FCRL4             | ZBTB32         | CHST15       | CD52                 | FKBP11         | KCTD12       |
| P2RX1         | FCRL5             | SP140          | QPCT         | ACTB                 | SSR4           | CCR5         |
| P2RY14        | CD27              | MNDA           | CD38         | HLA-DPB1             | HSP90B1        | LOC731424    |
| CCL8          | HLA-DRA           | TCF7           | PDK1         | TMSB4X               | DERL3          | SMPDL3A      |
| CD72          | CD24              | TRBC1          | MAN1A1       | LRMP                 | SEC11C         | CCR1         |
| TREM1         | TNF               | NCR3           | IGHE         | ARPC1B               | FKBP2          | NR4A3        |
| ZNF135        | TNFSF11 (RANKL)   | BCL2A1         | MAST1        | ARPC2                | RRBP1          | LOC102724297 |
| IL4R          | RUNX2             | CD86           | RRP12        | PLEK                 | HDLBP          | GPR34        |
|               | AICDA             |                |              | ACTG1                | SEL1L          | C7orf26      |
|               | SOX5              |                |              | SH3BGRL3             | PRDX4          | NR4A2        |
|               |                   |                |              | CD19                 | FNDC3B         | LOC90784     |
|               |                   |                |              | ARPC5                | SLAMF7         | SCN3A        |
|               |                   |                |              | COTL1                | SDF2L1         | GPR137B      |
|               |                   |                |              | SAMD9L               | SDC1           | LMO2         |
|               |                   |                |              | ARL6IP5              | LMAN1          | GSN          |
|               |                   |                |              | RFTN1                | NUCB2          | SIGLEC6      |
|               |                   |                |              | IFI44L               | SSR3           | LOC100130357 |
|               |                   |                |              | LAPTM5               | ITM2C          |              |

Reference  
 RA ABC and plasmablast Zhang Nat Imm 2019 PMID: 31061532  
 ABC Ehrhardt JEM 2008 PMID: 18625746  
 RA FCRL Amara J Autoim 2017 PMID: 28343748  
 Naive, memory Plasma cells CIBERSORT Newman Nat Methods 2015 PMID: 25822800
