# Supplementary material
Source: PubMed Central journal article supplement (PMC9559912)
Supplement: mmc5.pdf [file mmc5.pdf]

**Supplemental Table 5: CDR3 of Top 5 ocular CD4 T cell clones listed in order of frequency**

| <b>Patient</b> | <b>TCR<math>\alpha</math> CDR3</b>                                                                          | <b>TCR<math>\beta</math> CDR3</b>                                                           |
|----------------|-------------------------------------------------------------------------------------------------------------|---------------------------------------------------------------------------------------------|
| UV031          | CAASGGNAGKSTF<br>CATDGTGGSYIPTF<br>CAARWESGANNLFF<br>CAMREGKKRGSNYKLTF<br>CAVLGPNKLIF                       | CASSWDPGVGGQPQHF<br>CASSPGTGGQPQHF<br>CASSRSRESDTQYF<br>CAWGTRQPAANSPLHF<br>CASSTGAQETQYF   |
| UV150          | CALRTGPSNTGKLIF / CAVRSNDYKLSF<br>CAYRVYYGGSQGNLIF<br>CAVSPPYGNNRLAF<br>CIALNSGGSNYKLTF<br>CAASQNYGGSQGNLIF | CASSQNRNSPLHF<br>CASSVRASGAQETQYF<br>CASSSTGVPTDTQYF<br>CASSRSHLNIEQYF<br>CASSLVPGQLYGYTF   |
| UV170          | CAMTDSNYQLIW<br>CVVSHISNFGNEKLTF<br>CAAEGSARQLTF<br>CAASSGTYKYIF<br>CAGVAGGFKTIF                            | CASSSTGTGPAGKRNEQFF<br>CASSLYRGYTDQYF<br>CATVGSGGPNEQFF<br>CASRRTGQASYGYTF<br>CAIRGQGTDTQYF |
| UV174          | CVVSDQPPNDYKLSF<br>CAETVHNDMRF / CATGRNVLHC<br>CAGGPPRPGSGNTGKLIF<br>CAASPYSSASKIIF<br>CAVTPLSGGSYIPTF      | CSARDKGRIQYF<br>CASSLGQRAWGYTF<br>CSASKWKIGIYTF<br>CSARAMGTGELFF<br>CASSGLQVPGYTF           |
