# Supplementary material
Source: PubMed Central journal article supplement (PMC9559912)
Supplement: mmc6.pdf [file mmc6.pdf]

**Supplemental Table 6: CDR3 of Top 5 ocular CD8 T cell clones listed in order of frequency**

| <b>Patient</b> | <b>TCR<math>\alpha</math> CDR3</b>                                                  | <b>TCR<math>\beta</math> CDR3</b>                                                         |
|----------------|-------------------------------------------------------------------------------------|-------------------------------------------------------------------------------------------|
| UV031          | CALTGNQFYF<br>CAYRSAPGGSEKLVF<br>CAASASWGNYKLTF<br>CAMRAQGGSEKLVF<br>CAVGDNDYKLSF   | CSAEDRTAFVYEQYF<br>CASSVRGGNTEAFF<br>CASSQESSDTQYF<br>CASSSPGSSSGNTIYF<br>CASDRPGSPSYEQYF |
| UV150          | CAFMKHYSGGSNYKLTF<br>CAVRDSYTGNYFYF<br>CAYGRNQFYF<br>CALIETSGSRLTF<br>CAVINNAGNMLTF | CASSLPRRGNYEQYF<br>CASSQVLSSTDTQYF<br>CASSLASNYGYTF<br>CASSLAGSFTEAFF<br>CASSLEAGGRDTQYF  |
| UV170          | CAENTANQAGTALIF<br>CALSDRGNRLAF<br>CGAGGYNKLIF<br>CLVGGQGDKLIF<br>CAVSTGGFKTIF      | CASSLGGTGELFF<br>CASSFNTLPSYNEQFF<br>CASSLNSDGYEQYF<br>CASSEGDISYNEQFF<br>CASIDSNTGELFF   |
| UV174          | CAVERHKFYF<br>CAYSYGGSQGNLIF<br>CAERKNNNARLMF<br>CAVRDVEGGKLIF<br>CASAFSNDYKLSF     | CATSDFRQGNEQFF<br>CAWDGPAYNEQFF<br>CASSPGAGTEAFF<br>CASSTGSGAEKLFF<br>CASSYDPTDARTGELFF   |
