# Supplementary material
Source: PubMed Central journal article supplement (PMC9559912)
Supplement: mmc7.pdf [file mmc7.pdf]

**Supplemental Table 7: CDR3 of Top 5 ocular B cell clones listed in order of frequency**

| <b>Patient</b> | <b>TCR<math>\alpha</math> CDR3</b>                                                                          | <b>TCR<math>\beta</math> CDR3</b>                                            |
|----------------|-------------------------------------------------------------------------------------------------------------|------------------------------------------------------------------------------|
| UV031          | CARDRRDILTGSSPDHW<br>CASLGGGATFFHYW<br>CAHKGPFQTIVDYW<br>CARDFRPGDGSWYFDLW<br>CARDHGISFGVGRFDPW             | CMQGTYCCTF<br>CVLYMGSATSWWF<br>CSSYAGTYIFMMF<br>CSSYAAGDNLVF<br>CQQRSNWPLTF  |
| UV150          | CARLRGYAMIVVPPALRYFDYW<br>CARGSFDNSGYRYFDYW<br>CARLDSSGYNNWYFNWV<br>CAGIAYYLGYNWFDPW<br>CVKDISHLIRYSSSPLDYW | CQQYDNLITF<br>CQQYYGTPPTF<br>CSYARGSTLLF<br>CLQHRYYPPTF<br>CSSYTSSSTQVF      |
| UV174          | CAKDPDRAYCGGDCSFPPDYW<br>CARDQSPGYFDYW<br>CARLGMDAYDSRSLFDRW<br>CVRDIVVGAGDAFDIW<br>CARENAEAGFDIW           | CQQYGSSPRTF<br>CQQYNDWPKTF<br>CQSYDSAMSGWVF<br>CQSYDTSLTLVVF<br>CQLWDGISDYVF |
