# Supplementary material
Source: PubMed Central journal article supplement (PMC9559912)
Supplement: mmc8.pdf [file mmc8.pdf]

**Supplemental Table 8: HLA-genotyping of patients**

| Patient | HLA-A | HLA-B | HLA-C | HLA-DR          | HLA-DQ          | HLA-DP           |
|---------|-------|-------|-------|-----------------|-----------------|------------------|
| UV031   | A*23  | B*53  | C*04  | DR $\beta$ 1*08 | DQ $\beta$ 1*03 | DP $\beta$ 1*104 |
|         | A*29  | B*81  | C*18  | DR $\beta$ 1*11 | DQ $\beta$ 1*06 | DP $\beta$ 1*104 |
| UV150   | A*02  | B*14  | C*08  | DR $\beta$ 1*10 | DQ $\beta$ 1*03 | DP $\beta$ 1*01  |
|         | A*02  | B*81  | C*18  | DR $\beta$ 1*11 | DQ $\beta$ 1*05 | DP $\beta$ 1*104 |
| UV170   | A*01  | B*44  | C*02  | DR $\beta$ 1*13 | DQ $\beta$ 1*06 | DP $\beta$ 1*04  |
|         | A*23  | B*58  | C*03  | DR $\beta$ 1*15 | DQ $\beta$ 1*06 | DP $\beta$ 1*52  |
| UV174   | A*30  | B*15  | C*03  | DR $\beta$ 1*03 | DQ $\beta$ 1*02 | DP $\beta$ 1*01  |
|         | A*68  | B*53  | C*04  | DR $\beta$ 1*08 | DQ $\beta$ 1*03 | DP $\beta$ 1*01  |
