# Supplementary material
Source: PubMed Central journal article supplement (PMC9559912)
Supplement: mmc9.pdf [file mmc9.pdf]

Supplemental Table 9: TCR sequencing of B cells with CD3E expression

| Donor | Tissue | TRA_V       | TRA_J  | CDR3a                    | TRB_V    | TRB_J   | CDR3b                 | Number of Cells |
|-------|--------|-------------|--------|--------------------------|----------|---------|-----------------------|-----------------|
| UV031 | blood  | TRAV16      | TRAJ43 | CALSGRDNDMRF             | TRBV5-1  | TRBJ1-1 | CASSLSTAKGAEAFF       | 1               |
| UV031 | blood  | TRAV27      | TRAJ44 | CAGATGTASKTLF            | TRBV27   | TRBJ2-5 | CASSLSGTWGETQYF       | 1               |
| UV031 | blood  | TRAV14DV4   | TRAJ23 | CAMREGLRNQGGKLIFF        | TRBV6-3  | TRBJ2-7 | CASSYGTSGRYEQYF       | 1               |
| UV031 | blood  | TRAV27      | TRAJ48 | CAGAEANFGNEKTLF          | TRBV5-4  | TRBJ1-3 | CASSLQGNITFYF         | 1               |
| UV031 | blood  | TRAV10      | TRAJ42 | CVVTWNYGGSQGNLIFF        | TRBV6-5  | TRBJ2-1 | CASSYSGTRDEQFF        | 1               |
| UV031 | blood  | TRAV1-2     | TRAJ39 | CAVNNAGNMLTF             | TRBV4-3  | TRBJ2-2 | CASSRGGGTGELFF        | 1               |
| UV031 | blood  | TRAV13-1    | TRAJ54 | CAASIWGAQKLVF            | TRBV9    | TRBJ1-5 | CASSVDHKPNQPOHF       | 1               |
| UV031 | blood  | TRAV29DV5   | TRAJ54 | CAATSQAQGAQKLVF          | TRBV6-1  | TRBJ1-2 | CASSDRQYGYTF          | 1               |
| UV031 | blood  | TRAV12-3    | TRAJ37 | CAMDSNTKLIFF             | TRBV2    | TRBJ2-5 | CASSSELKTQYF          | 1               |
| UV031 | blood  | TRAV9-2     | TRAJ21 | CALRVNFKFYF              | TRBV12-4 | TRBJ1-5 | CASSLSGPNQPOHF        | 1               |
| UV031 | blood  | TRAV1-2     | TRAJ39 | CAVTDAGNMLTF             | TRBV2    | TRBJ1-2 | CASRDYPRNYGYTF        | 1               |
| UV031 | blood  | TRAV26-2    | TRAJ29 | CIPSLGNTPLVF             | TRBV20-1 | TRBJ2-3 | CSARLALNADTQYF        | 1               |
| UV031 | blood  | TRAV4       | TRAJ13 | CLVAPSSGGYQKVTFF         | TRBV6-3  | TRBJ2-6 | CASQGSTGANVLTFF       | 1               |
| UV031 | blood  | TRAV8-2     | TRAJ35 | CVVTGSGNYQLIWF           | TRBV11-2 | TRBJ2-2 | CASRNVRGSGTEGELFF     | 1               |
| UV031 | blood  | TRAV29DV5   | TRAJ43 | CAASQGYDMRF              | TRBV28   | TRBJ1-1 | CASSLAGGTEAFF         | 1               |
| UV031 | blood  | TRAV39      | TRAJ28 | CAVDRAAGSYQLTF           | TRBV20-1 | TRBJ1-1 | CSARLISTEAFF          | 1               |
| UV031 | blood  | TRAV39      | TRAJ48 | CAGRFGNEKTLF             | TRBV6-3  | TRBJ2-6 | CASSYHSIWDDSGANVLTFF  | 1               |
| UV031 | blood  | TRAV29DV5   | TRAJ22 | CAATSSGSAKQLTF           | TRBV6-5  | TRBJ1-5 | CASSQGGYQPOHF         | 1               |
| UV031 | blood  | TRAV5       | TRAJ42 | CAENGGSSQGNLIFF          | TRBV7-9  | TRBJ1-1 | CASSPQGRTEAFF         | 1               |
| UV031 | blood  | TRAV4       | TRAJ18 | CLVGDGRGSLGLRYF          | TRBV20-1 | TRBJ1-4 | CSAGEGHSEKLF          | 1               |
| UV031 | blood  | TRAV8-6     | TRAJ48 | CAVSDPLFNGEKLTF          | TRBV28   | TRBJ1-6 | CASSPARGTYNSPLHF      | 1               |
| UV031 | blood  | TRAV8-3     | TRAJ42 | CAVGGGSSQGNLIFF          | TRBV12-3 | TRBJ2-1 | CASSHEGLEQFF          | 1               |
| UV031 | blood  | TRAV12-1    | TRAJ9  | CVAGNTGGFKTIF            | TRBV12-3 | TRBJ1-1 | CASSFTVNTTEAFF        | 1               |
| UV031 | blood  | TRAV4       | TRAJ37 | CLLPSNTGKLIFF            | TRBV4-3  | TRBJ2-2 | CASSPRQGNTEGELFF      | 1               |
| UV031 | blood  | TRAV23DV6   | TRAJ54 | CAARNRGAQKLVF            | TRBV3-1  | TRBJ2-1 | CASSLSYNEQFF          | 1               |
| UV031 | blood  | TRAV38-2DV8 | TRAJ34 | CAYRRGTGGFKLIFF          | TRBV4-3  | TRBJ2-7 | CASSQDLSSEYQYF        | 1               |
| UV031 | blood  | TRAV12-2    | TRAJ4  | CAVLVISGGYKLIFF          | TRBV6-3  | TRBJ1-2 | CASSYSGGLLYGYTF       | 1               |
| UV031 | blood  | TRAV41      | TRAJ30 | CAVEDDKIIF               | TRBV7-8  | TRBJ1-2 | CASRPVGGYGYTF         | 1               |
| UV031 | blood  | TRAV3       | TRAJ5  | CAAMDTGRRALTF            | TRBV13   | TRBJ2-1 | CASSLESAGAHNEQFF      | 1               |
| UV031 | blood  | TRAV8-3     | TRAJ50 | CAVGEAKTSYKVIFF          | TRBV6-3  | TRBJ2-1 | CASRELGSGNEQFF        | 2               |
| UV031 | blood  | TRAV12-2    | TRAJ57 | CAVPOGGSEKLVF            | TRBV10-2 | TRBJ2-7 | CASSQEDISYEQYF        | 2               |
| UV031 | blood  | TRAV3       | TRAJ5  | CAAMDTGRRALTF            | TRBV13   | TRBJ2-1 | CASSLESAGAHNEQFF      | 2               |
| UV031 | blood  | TRAV27      | TRAJ50 | CAGAKETSVDKVIFF          | TRBV6-5  | TRBJ1-1 | CASSWTGPRNTEAFF       | 6               |
| UV031 | eye    | TRAV26-2    | TRAJ54 | CLRDPRRAQKLVF            | TRBV7-2  | TRBJ1-6 | CASSLGGGSRALHF        | 1               |
| UV031 | eye    | TRAV1-2     | TRAJ10 | CAVRVTGGGNKLIFF          | TRBV2    | TRBJ2-7 | CASCIFDEQYF           | 1               |
| UV031 | eye    | TRAV38-2DV8 | TRAJ57 | CAYRSAPGGSEKLVF          | TRBV5-1  | TRBJ1-1 | CASSVRGGNTEAFF        | 1               |
| UV031 | eye    | TRAV12-2    | TRAJ40 | CAVREASGTYYKIF           | TRBV29-1 | TRBJ2-1 | CSGKGERGSYNEQFF       | 1               |
| UV031 | eye    | TRAV27      | TRAJ28 | CAVDSGAGSYQLTF           | TRBV5-1  | TRBJ1-6 | CASSPFGGAGLEKHFH      | 1               |
| UV031 | eye    | TRAV8-2     | TRAJ52 | CAVPPGTSYKLIFF           | TRBV3-1  | TRBJ2-1 | CASSRRDAEQFF          | 1               |
| UV031 | eye    | TRAV8-4     | TRAJ36 | CAVSDPSTGANLIFF          | TRBV6-5  | TRBJ1-4 | CASSSRGKELFF          | 1               |
| UV031 | eye    | TRAV38-2DV8 | TRAJ49 | CALTGNQYFF               | TRBV20-1 | TRBJ2-7 | CSAEDRTAFVYEQYF       | 1               |
| UV031 | eye    | TRAV14DV4   | TRAJ53 | CAMREGKRRGSNYKLIFF       | TRBV30   | TRBJ1-6 | CAWGTTRQPAANSPLHF     | 1               |
| UV031 | eye    | TRAV14DV4   | TRAJ57 | CAMRETQGGSEKLVF          | TRBV4-1  | TRBJ1-2 | CASSQDQSGAPYGYTF      | 1               |
| UV031 | eye    | TRAV12-2    | TRAJ28 | CAVNPSYGGAGSYQLTF        | TRBV29-1 | TRBJ2-5 | CSVEDLGRRETQYF        | 2               |
| UV031 | eye    | TRAV29DV5   | TRAJ27 | CAASGGNAGKSTF            | TRBV2    | TRBJ1-5 | CASSWDPGVGGQPQHF      | 2               |
| UV150 | blood  | TRAV27      | TRAJ49 | CAGAKTGNQYFF             | TRBV6-1  | TRBJ1-2 | CASSARTGGDYGYTF       | 1               |
| UV150 | blood  | TRAV24      | TRAJ23 | CASGYNQGGKLIFF           | TRBV5-5  | TRBJ2-5 | CASSLTLTGGYQETQYF     | 1               |
| UV150 | blood  | TRAV21      | TRAJ39 | CAVRDNAGNMLTF            | TRBV7-2  | TRBJ2-1 | CASSFDSSYNEQFF        | 1               |
| UV150 | blood  | TRAV12-2    | TRAJ34 | CAVSDNTDKLIFF            | TRBV25-1 | TRBJ1-2 | CASSTGGADYGYTF        | 1               |
| UV150 | blood  | TRAV41      | TRAJ32 | CAVLGGATNKLIFF           | TRBV3-1  | TRBJ2-1 | CASSPWGIGSYNEQFF      | 1               |
| UV150 | blood  | TRAV12-3    | TRAJ29 | CAMSSGNTPLVF             | TRBV11-2 | TRBJ2-2 | CASRSTGTSVTGELFF      | 1               |
| UV150 | blood  | TRAV1-2     | TRAJ26 | CAVRFYQGNFVF             | TRBV2    | TRBJ2-3 | CASSRTSGTDDTQYF       | 1               |
| UV150 | blood  | TRAV38-2DV8 | TRAJ34 | CAYRVNTDKLIFF            | TRBV20-1 | TRBJ2-7 | CSAKRLAGVLEQYF        | 1               |
| UV150 | blood  | TRAV29DV5   | TRAJ42 | CAARAMLNYGGSQGNLIFF      | TRBV15   | TRBJ2-7 | CATSLRQGLYEQYF        | 1               |
| UV150 | blood  | TRAV19      | TRAJ34 | CALGHNTDKLIFF            | TRBV4-3  | TRBJ2-1 | CASSQDGGPMLFF         | 1               |
| UV150 | blood  | TRAV27      | TRAJ58 | CASGGSRLTF               | TRBV6-5  | TRBJ1-3 | CASSYYPFGQASGNTIYF    | 1               |
| UV150 | blood  | TRAV26-1    | TRAJ52 | CIDDAGGTSYKLIFF          | TRBV7-2  | TRBJ2-5 | CASSLKMGGYQETQYF      | 1               |
| UV150 | eye    | TRAV26-1    | TRAJ53 | CIALNSGGSNYKLIFF         | TRBV6-5  | TRBJ2-7 | CASSRSHLNYEQYF        | 1               |
| UV150 | eye    | TRAV29DV5   | TRAJ52 | CAASELPSEHSNQQGGTSYKLIFF | TRBV6-5  | TRBJ1-2 | CASSKTVNYGYTF         | 1               |
| UV150 | eye    | TRAV38-2DV8 | TRAJ49 | CAYGRNQYFF               | TRBV12-3 | TRBJ2-2 | CASSLVTIGELFF         | 1               |
| UV150 | eye    | TRAV3       | TRAJ7  | CAVSPYGNRLAF             | TRBV7-6  | TRBJ2-3 | CASSSTGVPTDTQYF       | 1               |
| UV150 | eye    | TRAV38-2DV8 | TRAJ49 | CAYGRNQYFF               | TRBV11-2 | TRBJ1-2 | CASSLASNYGYTF         | 1               |
| UV150 | eye    | TRAV13-1    | TRAJ17 | CAASTEAGNMLTF            | TRBV6-3  | TRBJ1-2 | CASSYGAENYGYTF        | 1               |
| UV150 | eye    | TRAV1-2     | TRAJ9  | CAVEGSGTGFKTIF           | TRBV27   | TRBJ2-1 | CASSPASGEQFF          | 1               |
| UV150 | eye    | TRAV3       | TRAJ29 | CAVRDLVLTGNTPLVF         | TRBV12-3 | TRBJ2-1 | CASSLGGQVNEQFF        | 1               |
| UV150 | eye    | TRAV5       | TRAJ39 | CAVINNAGNMLTF            | TRBV5-1  | TRBJ2-3 | CASSLEAGGRDTQYF       | 1               |
| UV150 | eye    | TRAV8-3     | TRAJ45 | CAVGGSGGADGLTF           | TRBV7-3  | TRBJ2-3 | CASSLGPSSGGGDTQYF     | 1               |
| UV150 | eye    | TRAV12-1    | TRAJ4  | CAVNFPSGGYKLIFF          | TRBV10-3 | TRBJ2-3 | CAISESTSTDTQYF        | 1               |
| UV150 | eye    | TRAV17      | TRAJ13 | CATLPPSGGYQKVTFF         | TRBV28   | TRBJ2-3 | CASKIFIADTQYF         | 1               |
| UV150 | eye    | TRAV12-2    | TRAJ33 | CAVNTGNYQLIWF            | TRBV3-1  | TRBJ2-7 | CASSAQGGEQYF          | 1               |
| UV150 | eye    | TRAV38-1    | TRAJ53 | CAFMKHYSGGSNYKLIFF       | TRBV19   | TRBJ2-7 | CASSLPRRGNYEQYF       | 1               |
| UV150 | eye    | TRAV8-3     | TRAJ44 | CAVGPHTGTASKLTF          | TRBV7-9  | TRBJ1-5 | CASSLSQGGLEPQHF       | 1               |
| UV150 | eye    | TRAV3       | TRAJ7  | CAVSPYGNRLAF             | TRBV7-2  | TRBJ1-1 | CASSLRLQTPPEAFF       | 1               |
| UV150 | eye    | TRAV17      | TRAJ3  | CATGYSSASKIIF            | TRBV20-1 | TRBJ2-3 | CSAQTSGRIGDTQYF       | 1               |
| UV150 | eye    | TRAV20      | TRAJ52 | CAVQGTSGYKLIFF           | TRBV2    | TRBJ2-3 | CASSEARGGPTDTQYF      | 1               |
| UV150 | eye    | TRAV8-4     | TRAJ37 | CAVSDRHRGSGNTGKLIFF      | TRBV4-1  | TRBJ1-1 | CASSQDRPRTAETMNTTEAFF | 1               |
| UV150 | eye    | TRAV3       | TRAJ39 | CAVSSYNAGNMLTF           | TRBV10-3 | TRBJ2-1 | CAIRAGGLADNEQFF       | 1               |
| UV150 | eye    | TRAV38-2DV8 | TRAJ21 | CNVYFNFKFYF              | TRBV5-1  | TRBJ2-7 | CASSTGNTYEQYF         | 1               |
| UV150 | eye    | TRAV5       | TRAJ39 | CAVINNAGNMLTF            | TRBV5-1  | TRBJ2-3 | CASSLEAGGRDTQYF       | 1               |
| UV150 | eye    | TRAV8-1     | TRAJ13 | CAVNPSGGYQKVTFF          | TRBV7-9  | TRBJ2-3 | CASSRGGGETDTQYF       | 1               |
| UV150 | eye    | TRAV19      | TRAJ17 | CALSEAPRAAGNMLTF         | TRBV7-6  | TRBJ2-1 | CASSVLVGLSNEQFF       | 1               |
| UV150 | eye    | TRAV8-2     | TRAJ20 | CVVSDNSDYKLSF            | TRBV11-2 | TRBJ2-3 | CASSFSGTTDDTQYF       | 2               |
| UV150 | eye    | TRAV29DV5   | TRAJ30 | CAANHHGDKIIF             | TRBV27   | TRBJ1-1 | CASSLFDNRTEAFF        | 3               |
| UV150 | eye    | TRAV3       | TRAJ39 | CAVSSYNAGNMLTF           | TRBV10-3 | TRBJ2-1 | CAIRAGGLADNEQFF       | 3               |
| UV170 | blood  | TRAV29DV5   | TRAJ52 | CAASRGGGTSYKLIFF         | TRBV6-1  | TRBJ1-5 | CASRRRTGTGLVSNQPOHF   | 1               |
| UV170 | blood  | TRAV12-3    | TRAJ30 | CAMKDDKIIF               | TRBV19   | TRBJ1-5 | CASSTTGEYQPOHF        | 1               |
| UV170 | blood  | TRAV12-1    | TRAJ28 | CVGFSGAGSYQLTF           | TRBV6-5  | TRBJ2-1 | CASSYSGTGEFF          | 1               |
| UV170 | blood  | TRAV22      | TRAJ20 | CAGNDYKLSF               | TRBV12-4 | TRBJ2-3 | CASSLVSVTGYTF         | 1               |
| UV170 | blood  | TRAV22      | TRAJ32 | CAVEGYGGATNKLIFF         | TRBV30   | TRBJ1-1 | CAWSAQGGAEAFF         | 2               |
| UV174 | blood  | TRAV14DV4   | TRAJ53 | CAMREGGGSNYKLIFF         | TRBV27   | TRBJ2-2 | CASSLIFTGELFF         | 1               |
| UV174 | blood  | TRAV1-2     | TRAJ20 | CAVRDLVYKLSF             | TRBV5-4  | TRBJ2-7 | CASSQYRTSGSPYEQYF     | 1               |
| UV174 | blood  | TRAV12-2    | TRAJ6  | CAFVSGGSYIPTF            | TRBV30   | TRBJ1-5 | CAWSVGVQVSNQPOHF      | 1               |
| UV174 | blood  | TRAV2       | TRAJ27 | CAVAGTNAGKSTF            | TRBV18   | TRBJ1-4 | CASSPSGGDNEKLF        | 1               |
| UV174 | blood  | TRAV9-2     | TRAJ44 | CALSGRNTGTASKLTF         | TRBV5-6  | TRBJ2-1 | CASSFIGATNEQFF        | 1               |
| UV174 | blood  | TRAV17      | TRAJ7  | CATDRGYGNRLAF            | TRBV3-1  | TRBJ1-3 | CASSPYAGTSGSGNTIYF    | 1               |
| UV174 | blood  | TRAV9-2     | TRAJ49 | CATGGNQYFF               | TRBV6-5  | TRBJ1-6 | CASSLYGSSYNSPLHF      | 1               |
| UV174 | blood  | TRAV12-2    | TRAJ29 | CAVKESGNTPLVF            | TRBV2    | TRBJ2-3 | CARAIGTDTQYF          | 1               |
| UV174 | eye    | TRAV8-3     | TRAJ47 | CAVGPGEYGNKLVF           | TRBV30   | TRBJ2-2 | CAWTAGNTGELFF         | 1               |
| UV174 | eye    | TRAV8-2     | TRAJ20 | CVVSDQPPNDYKLSF          | TRBV20-1 | TRBJ2-4 | CSARDKGRIQYF          | 2               |
