# Supplementary material
Source: PubMed Central journal article supplement (PMC9559912)
Supplement: mmc10.pdf [file mmc10.pdf]

**Supplemental Table 10: Gene ontology (GO) pathway analysis of ocular ABCs demonstrate expression of genes associated with antigen presentation**

| GO Pathway                                                                                                                             | Fold Enrichment | Raw p-value | FDR      |
|----------------------------------------------------------------------------------------------------------------------------------------|-----------------|-------------|----------|
| peptide antigen assembly with MHC class II protein complex (GO:0002503)                                                                | > 100           | 1.30E-07    | 4.79E-05 |
| MHC class II protein complex assembly (GO:0002399)                                                                                     | > 100           | 1.30E-07    | 4.69E-05 |
| peptide antigen assembly with MHC protein complex (GO:0002501)                                                                         | > 100           | 3.62E-07    | 1.11E-04 |
| MHC protein complex assembly (GO:0002396)                                                                                              | > 100           | 5.42E-07    | 1.60E-04 |
| positive regulation of aspartic-type peptidase activity (GO:1905247)                                                                   | > 100           | 1.94E-04    | 2.95E-02 |
| regulation of neutrophil activation (GO:1902563)                                                                                       | 94.78           | 2.75E-04    | 4.02E-02 |
| regulation of aspartic-type peptidase activity (GO:1905245)                                                                            | 86.88           | 3.21E-04    | 4.56E-02 |
| mature B cell differentiation (GO:0002335)                                                                                             | 65.16           | 1.84E-05    | 3.91E-03 |
| B cell homeostasis (GO:0001782)                                                                                                        | 65.16           | 1.84E-05    | 3.86E-03 |
| immunoglobulin production involved in immunoglobulin mediated immune response (GO:0002381)                                             | 60.15           | 2.30E-05    | 4.62E-03 |
| B cell proliferation (GO:0042100)                                                                                                      | 50.86           | 1.62E-06    | 4.37E-04 |
| negative regulation of B cell activation (GO:0050869)                                                                                  | 47.39           | 4.44E-05    | 7.95E-03 |
| B cell receptor signaling pathway (GO:0050853)                                                                                         | 40.72           | 8.14E-14    | 8.64E-11 |
| antigen processing and presentation of exogenous peptide antigen via MHC class II (GO:0019886)                                         | 37.23           | 1.08E-09    | 6.59E-07 |
| B cell activation (GO:0042113)                                                                                                         | 37.23           | 1.01E-14    | 1.24E-11 |
| antigen processing and presentation of peptide antigen via MHC class II (GO:0002495)                                                   | 36.49           | 1.23E-09    | 7.25E-07 |
| interferon-gamma-mediated signaling pathway (GO:0060333)                                                                               | 36.2            | 3.55E-07    | 1.11E-04 |
| antigen processing and presentation of peptide or polysaccharide antigen via MHC class II (GO:0002504)                                 | 35.77           | 1.40E-09    | 7.69E-07 |
| B cell activation involved in immune response (GO:0002312)                                                                             | 35.54           | 9.95E-05    | 1.57E-02 |
| B cell differentiation (GO:0030183)                                                                                                    | 33.48           | 2.17E-09    | 1.15E-06 |
| regulation of cell adhesion mediated by integrin (GO:0033628)                                                                          | 32.58           | 1.27E-04    | 1.98E-02 |
| lymphocyte homeostasis (GO:0002260)                                                                                                    | 29.51           | 1.68E-04    | 2.57E-02 |
| antigen receptor-mediated signaling pathway (GO:0050851)                                                                               | 26.42           | 8.03E-18    | 6.39E-14 |
| lymphocyte proliferation (GO:0046651)                                                                                                  | 25.74           | 2.09E-05    | 4.31E-03 |
| mononuclear cell proliferation (GO:0032943)                                                                                            | 25.12           | 2.29E-05    | 4.67E-03 |
| regulation of B cell proliferation (GO:0030888)                                                                                        | 24.82           | 2.74E-04    | 4.03E-02 |
| positive regulation of leukocyte proliferation (GO:0070665)                                                                            | 22.18           | 3.45E-07    | 1.10E-04 |
| leukocyte proliferation (GO:0070661)                                                                                                   | 21.95           | 3.80E-05    | 7.04E-03 |
| positive regulation of T cell proliferation (GO:0042102)                                                                               | 21.5            | 4.11E-05    | 7.44E-03 |
| antigen processing and presentation of exogenous peptide antigen (GO:0002478)                                                          | 20.73           | 5.15E-08    | 2.16E-05 |
| antigen processing and presentation of exogenous antigen (GO:0019884)                                                                  | 19.94           | 6.67E-08    | 2.72E-05 |
| positive regulation of lymphocyte proliferation (GO:0050671)                                                                           | 19.45           | 6.62E-06    | 1.60E-03 |
| positive regulation of mononuclear cell proliferation (GO:0032946)                                                                     | 19.31           | 6.85E-06    | 1.63E-03 |
| antigen processing and presentation of peptide antigen (GO:0048002)                                                                    | 18.71           | 1.01E-07    | 3.84E-05 |
| antigen processing and presentation (GO:0019882)                                                                                       | 18.62           | 1.16E-08    | 5.77E-06 |
| immune response-regulating signaling pathway (GO:0002764)                                                                              | 18.23           | 1.25E-17    | 6.64E-14 |
| immune response-activating cell surface receptor signaling pathway (GO:0002429)                                                        | 17.45           | 2.96E-15    | 4.28E-12 |
| immune response-activating signal transduction (GO:0002757)                                                                            | 17.45           | 2.96E-15    | 3.92E-12 |
| lymphocyte differentiation (GO:0030098)                                                                                                | 17.45           | 1.89E-08    | 8.36E-06 |
| T cell receptor signaling pathway (GO:0050852)                                                                                         | 17.38           | 1.37E-06    | 3.76E-04 |
| immune response-regulating cell surface receptor signaling pathway (GO:0002768)                                                        | 17.27           | 3.28E-16    | 7.46E-13 |
| regulation of B cell activation (GO:0050864)                                                                                           | 17.13           | 1.81E-07    | 6.41E-05 |
| adaptive immune response (GO:0002250)                                                                                                  | 16.98           | 2.56E-20    | 4.07E-16 |
| regulation of lymphocyte proliferation (GO:0050670)                                                                                    | 16.89           | 1.99E-07    | 6.73E-05 |
| regulation of mononuclear cell proliferation (GO:0032944)                                                                              | 16.74           | 2.11E-07    | 7.00E-05 |
| lymphocyte activation (GO:0046649)                                                                                                     | 16.42           | 5.78E-12    | 4.84E-09 |
| regulation of leukocyte proliferation (GO:0070663)                                                                                     | 15.93           | 2.92E-07    | 9.47E-05 |
| cellular response to interferon-gamma (GO:0071346)                                                                                     | 15.89           | 1.71E-05    | 3.67E-03 |
| leukocyte differentiation (GO:0002521)                                                                                                 | 15.24           | 8.79E-10    | 5.59E-07 |
| activation of immune response (GO:0002253)                                                                                             | 15.07           | 2.39E-14    | 2.72E-11 |
| positive regulation of T cell activation (GO:0050870)                                                                                  | 15.04           | 3.09E-06    | 7.81E-04 |
| response to interferon-gamma (GO:0034341)                                                                                              | 14.01           | 3.08E-05    | 5.97E-03 |
| positive regulation of leukocyte cell-cell adhesion (GO:1903039)                                                                       | 13.84           | 4.92E-06    | 1.22E-03 |
| adaptive immune response based on somatic recombination of immune receptors built from immunoglobulin superfamily domains (GO:0002460) | 13.51           | 8.57E-07    | 2.39E-04 |
| positive regulation of peptidase activity (GO:0010952)                                                                                 | 13.3            | 3.93E-05    | 7.18E-03 |
| regulation of T cell proliferation (GO:0042129)                                                                                        | 12.79           | 2.88E-04    | 4.16E-02 |
| immunoglobulin mediated immune response (GO:0016064)                                                                                   | 12.78           | 4.73E-05    | 8.09E-03 |
| positive regulation of immune response (GO:0050778)                                                                                    | 12.61           | 5.72E-16    | 1.01E-12 |
| B cell mediated immunity (GO:0019724)                                                                                                  | 12.59           | 5.06E-05    | 8.57E-03 |
| Fc-epsilon receptor signaling pathway (GO:0038095)                                                                                     | 12.05           | 3.59E-04    | 4.96E-02 |
| lymphocyte mediated immunity (GO:0002449)                                                                                              | 11.94           | 1.12E-05    | 2.59E-03 |
| positive regulation of immune effector process (GO:0002699)                                                                            | 11.69           | 7.14E-05    | 1.17E-02 |
| positive regulation of cell-cell adhesion (GO:0022409)                                                                                 | 11.58           | 1.33E-05    | 2.97E-03 |
| positive regulation of leukocyte activation (GO:0002696)                                                                               | 11.44           | 7.60E-08    | 3.02E-05 |
| positive regulation of lymphocyte activation (GO:0051251)                                                                              | 11.33           | 4.75E-07    | 1.43E-04 |
| regulation of leukocyte activation (GO:0002694)                                                                                        | 11.2            | 6.77E-11    | 5.39E-08 |
| positive regulation of cell activation (GO:0050867)                                                                                    | 11.06           | 1.01E-07    | 3.90E-05 |
| hemopoiesis (GO:0030097)                                                                                                               | 10.99           | 5.25E-10    | 3.48E-07 |
| regulation of lymphocyte activation (GO:0051249)                                                                                       | 10.96           | 3.25E-09    | 1.67E-06 |
| regulation of immune response (GO:0050776)                                                                                             | 10.62           | 2.40E-17    | 9.55E-14 |
| regulation of cell activation (GO:0050865)                                                                                             | 10.51           | 1.47E-10    | 1.11E-07 |
| immune system development (GO:0002520)                                                                                                 | 10.36           | 1.74E-10    | 1.26E-07 |
| hematopoietic or lymphoid organ development (GO:0048534)                                                                               | 10.14           | 1.29E-09    | 7.34E-07 |
| regulation of leukocyte cell-cell adhesion (GO:1903037)                                                                                | 10.12           | 2.79E-05    | 5.56E-03 |
| regulation of T cell activation (GO:0050863)                                                                                           | 9.65            | 3.62E-05    | 6.78E-03 |
| positive regulation of immune system process (GO:0002684)                                                                              | 9.64            | 1.18E-15    | 1.88E-12 |
| leukocyte activation (GO:0045321)                                                                                                      | 9.1             | 5.06E-12    | 4.73E-09 |
| cell activation (GO:0001775)                                                                                                           | 8.82            | 2.40E-13    | 2.39E-10 |
| regulation of cell-cell adhesion (GO:0022407)                                                                                          | 8.81            | 1.35E-05    | 2.98E-03 |
| positive regulation of cytosolic calcium ion concentration (GO:0007204)                                                                | 8.75            | 2.70E-04    | 4.01E-02 |
| positive regulation of defense response (GO:0031349)                                                                                   | 8.5             | 7.26E-05    | 1.18E-02 |
| regulation of immune system process (GO:0002682)                                                                                       | 7.78            | 4.20E-17    | 1.34E-13 |
| regulation of immune effector process (GO:0002697)                                                                                     | 7.71            | 3.13E-05    | 6.00E-03 |
| leukocyte activation involved in immune response (GO:0002366)                                                                          | 7.59            | 2.22E-06    | 5.79E-04 |
| cell activation involved in immune response (GO:0002263)                                                                               | 7.54            | 2.34E-06    | 6.00E-04 |
| positive regulation of cell adhesion (GO:0045785)                                                                                      | 7.43            | 1.50E-04    | 2.32E-02 |
| immune response (GO:0006955)                                                                                                           | 6.97            | 7.88E-17    | 2.09E-13 |
| response to bacterium (GO:0009617)                                                                                                     | 6.64            | 6.54E-06    | 1.60E-03 |
| leukocyte mediated immunity (GO:0002443)                                                                                               | 6.17            | 1.16E-05    | 2.64E-03 |
| innate immune response (GO:0045087)                                                                                                    | 6.05            | 1.37E-05    | 2.98E-03 |
| cytokine-mediated signaling pathway (GO:0019221)                                                                                       | 6.01            | 4.63E-05    | 8.10E-03 |
| response to other organism (GO:0051707)                                                                                                | 5.8             | 1.29E-08    | 6.22E-06 |
| immune effector process (GO:0002252)                                                                                                   | 5.8             | 5.55E-07    | 1.61E-04 |
| response to external biotic stimulus (GO:0043207)                                                                                      | 5.8             | 1.32E-08    | 6.16E-06 |
| regulation of cytokine production (GO:0001817)                                                                                         | 5.74            | 6.40E-05    | 1.07E-02 |
| response to biotic stimulus (GO:0009607)                                                                                               | 5.66            | 1.80E-08    | 8.17E-06 |
| regulation of defense response (GO:0031347)                                                                                            | 5.33            | 3.02E-04    | 4.34E-02 |
| immune system process (GO:0002376)                                                                                                     | 5.27            | 3.39E-16    | 6.75E-13 |
| regulation of cell adhesion (GO:0030155)                                                                                               | 5.19            | 3.56E-04    | 4.98E-02 |
| positive regulation of response to stimulus (GO:0048584)                                                                               | 4.89            | 5.31E-12    | 4.69E-09 |
| defense response to other organism (GO:0098542)                                                                                        | 4.86            | 7.54E-05    | 1.21E-02 |
| positive regulation of cell population proliferation (GO:0008284)                                                                      | 4.53            | 3.21E-04    | 4.52E-02 |
| interspecies interaction between organisms (GO:0044419)                                                                                | 4.44            | 5.11E-08    | 2.20E-05 |
| defense response (GO:0006952)                                                                                                          | 3.83            | 1.97E-04    | 2.95E-02 |
| cell surface receptor signaling pathway (GO:0007166)                                                                                   | 3.78            | 1.96E-07    | 6.77E-05 |
| homeostatic process (GO:0042592)                                                                                                       | 3.76            | 4.57E-05    | 8.09E-03 |
| regulation of response to stimulus (GO:0048583)                                                                                        | 3.25            | 2.58E-10    | 1.78E-07 |
| response to external stimulus (GO:0009605)                                                                                             | 3.16            | 2.85E-05    | 5.60E-03 |
| cell differentiation (GO:0030154)                                                                                                      | 2.51            | 7.12E-05    | 1.18E-02 |
| cellular developmental process (GO:0048869)                                                                                            | 2.45            | 9.92E-05    | 1.58E-02 |
| signal transduction (GO:0007165)                                                                                                       | 2.34            | 9.62E-06    | 2.25E-03 |
| positive regulation of biological process (GO:0048518)                                                                                 | 2.25            | 1.72E-06    | 4.56E-04 |
| signaling (GO:0023052)                                                                                                                 | 2.18            | 3.60E-05    | 6.81E-03 |
| cell communication (GO:0007154)                                                                                                        | 2.14            | 4.68E-05    | 8.09E-03 |
| response to stimulus (GO:0050896)                                                                                                      | 1.95            | 8.17E-07    | 2.32E-04 |
