# Supplementary material
Source: PubMed Central journal article supplement (PMC9559912)
Supplement: mmc12.pdf [file mmc12.pdf]

## Supplemental Figure 2

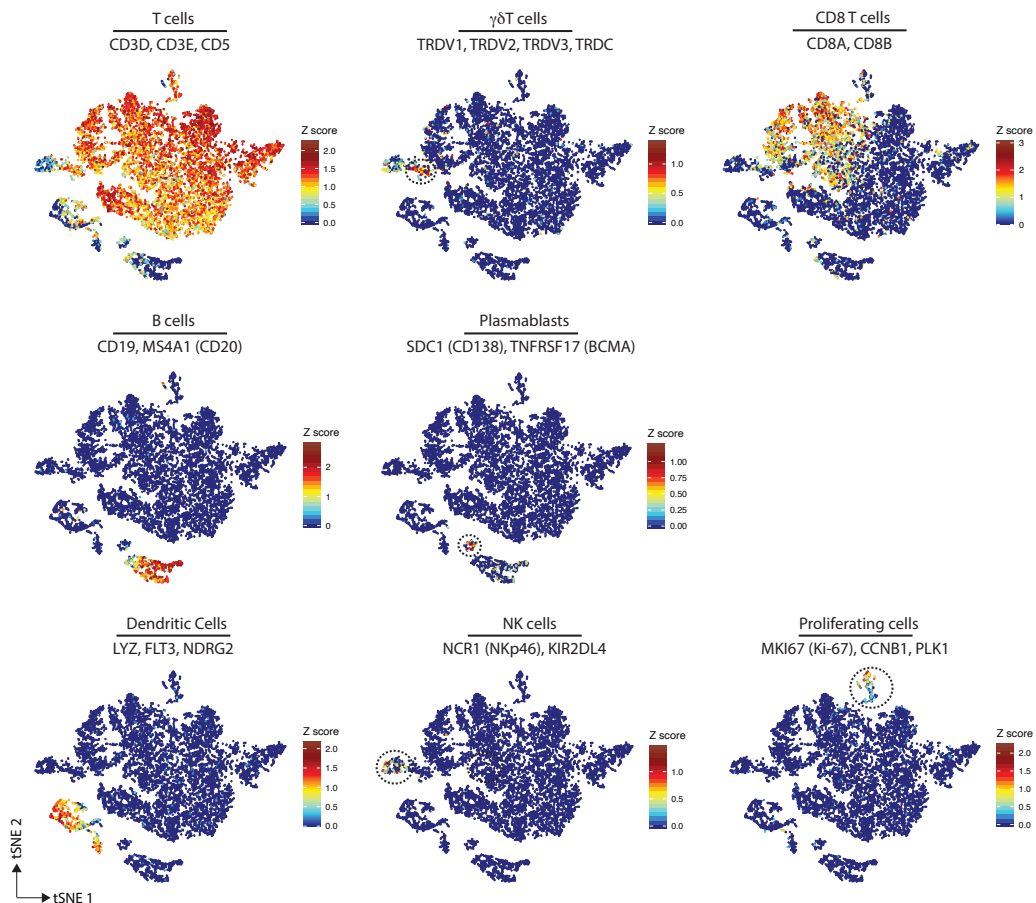

**Supplemental Figure 2: Ocular immune cells were defined by canonical gene expression.** tSNE plots showing the Z score of the indicated gene sets for the indicated cell lineages.
