# Supplementary material
Source: PubMed Central journal article supplement (PMC9559912)
Supplement: mmc13.pdf [file mmc13.pdf]

## Supplemental Figure 3

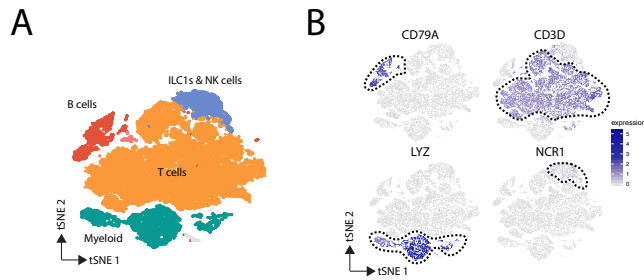

**Supplemental Figure 3: Blood and ocular immune cells were defined by canonical gene expression for T and B cell sub-analysis. (A)** Blood and ocular immune cells on a tSNE visualization, colored by hematopoietic type. **(B)** Canonical gene expression that define the four cell types shown in (A).
