# Supplementary material
Source: PubMed Central journal article supplement (PMC9559912)
Supplement: mmc14.pdf [file mmc14.pdf]

## Supplemental Figure 4

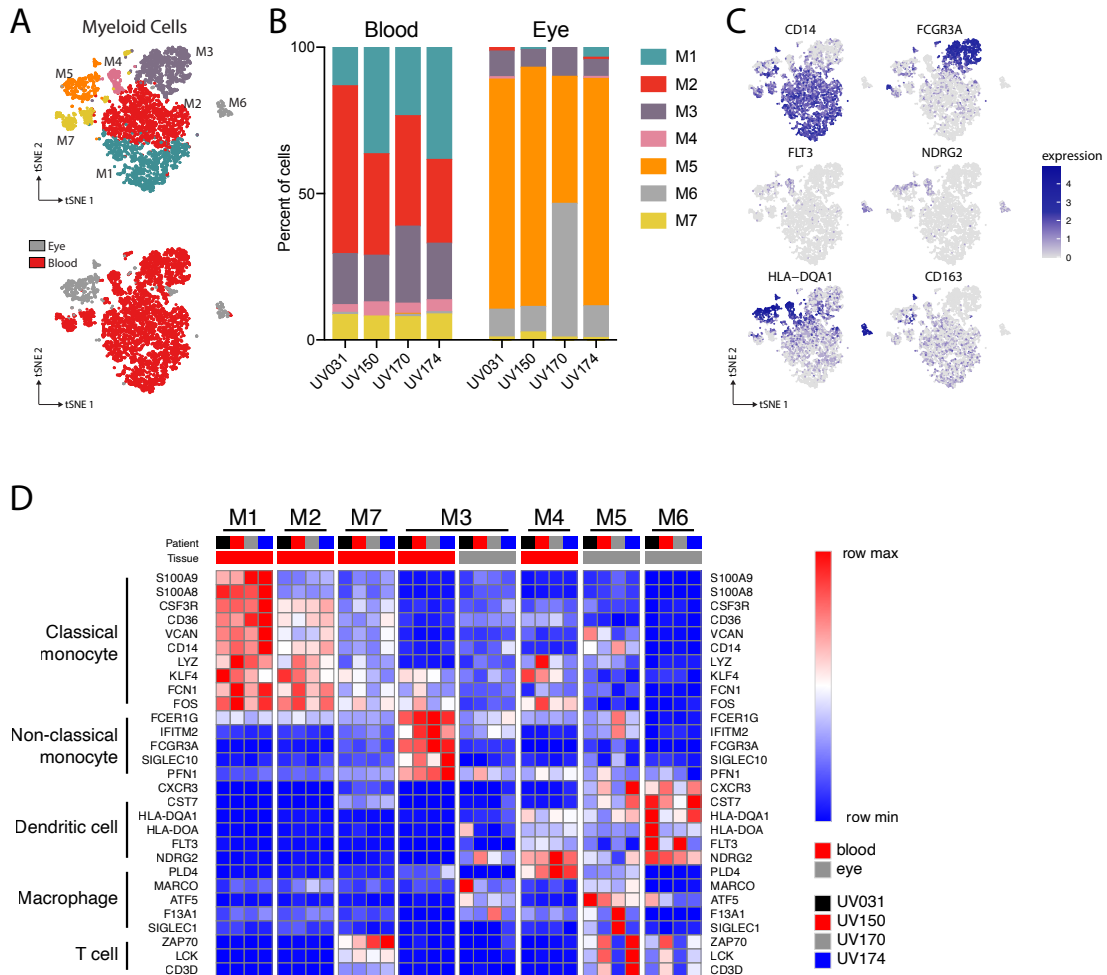

**Supplemental Figure 4. Myeloid cells in granulomatous uveitis are transcriptionally distinct from peripheral blood myeloid cells.** *LYZ*<sup>+</sup> clusters from **Supplemental Figure 3** were selected to undergo targeted sub-analysis. **(A)** tSNE plot colored by cluster (*upper panel*) or tissue source (*lower panel*). **(B)** Distribution of cells between each cluster in blood (*left*) and eye (*right*). **(C)** Expression of key genes for myeloid lineages. Peripheral blood myeloid cells included *CD14*<sup>+</sup> classical monocytes and *FCGR3A*<sup>+</sup> non-classical monocytes. Ocular myeloid cells expressed the conventional dendritic cell markers *FLT3* and *NDRG2*, higher levels of MHC II (*HLA-DQA1*), and variable expression of the monocyte-macrophage marker *CD163*. **(D)** The cluster-defining genes were plotted as a heatmap where red represents maximal, and blue minimal, expression across a row for each gene. Genes which are specific to individual subsets are indicated with labeled brackets.
