# Supplementary material
Source: PubMed Central journal article supplement (PMC9559912)
Supplement: mmc15.pdf [file mmc15.pdf]

## Supplemental Figure 5

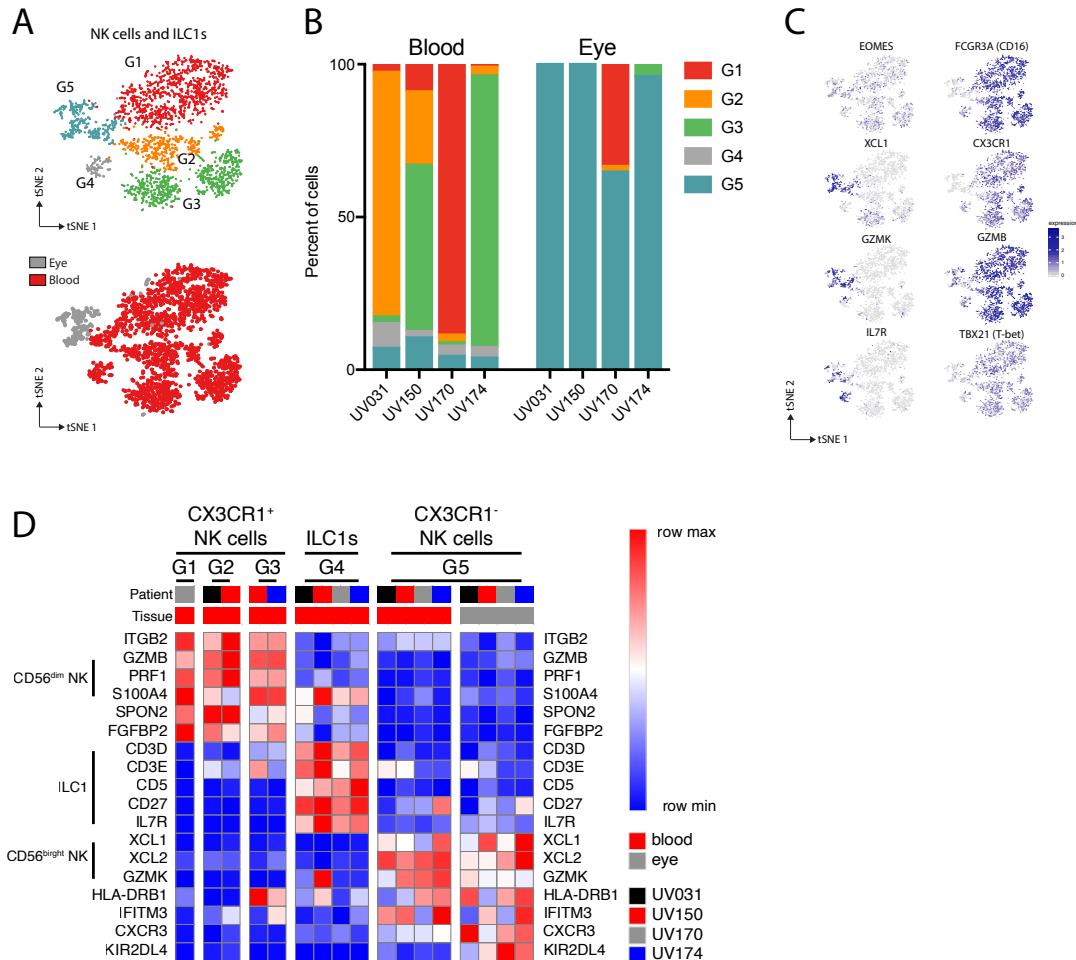

**Supplemental Figure 5. NK cells in uveitis are phenotypically distinct from most peripheral blood NK cells.** *NCR1*<sup>+</sup> clusters from **Supplemental Figure 3** were selected to undergo targeted subanalysis. **(A)** Innate lymphoid cell (NK cell and ILC)-only tSNE plot colored by cluster (*upper panel*) or tissue source (*lower panel*). **(B)** Distribution of cells between each cluster in blood (*left*) and eye (*right*). **(C)** tSNE analysis for key subset-defining genes. All the cells expressed *EOMES*, and, despite separate cluster distribution, most peripheral blood NK cells expressed *FCGR3A* (CD16), *CX3CR1*, *GZMB* and *TBX21* (T-bet), markers consistent with CD56<sup>dim</sup> NK cells. A small cluster G5 expressed the ILC1 gene *IL7R*. Ocular NK cells expressed *XCL1* and *GZMK* but did not express *CX3CR1*. **(D)** The cluster-defining genes were plotted as a heatmap where red represents maximal, and blue minimal, expression across a row for each gene. Genes which are specific to individual subsets are indicated with labeled brackets.
