# Supplementary material
Source: PubMed Central journal article supplement (PMC9559912)
Supplement: mmc16.pdf [file mmc16.pdf]

## Supplemental Figure 6

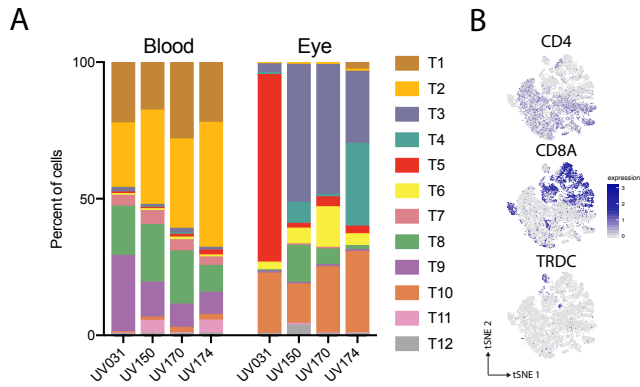

**Supplemental Figure 6: Patient-to-patient variation of ocular T cell clustering is due to variable CD4 T cell transcriptional programs. (A)** Cluster abundance for blood and ocular T cells. **(B)** Normalized expression of *CD4*, *CD8A*, and *TRDC* on a tSNE visualization.
