# Supplementary material
Source: PubMed Central journal article supplement (PMC9559912)
Supplement: mmc17.pdf [file mmc17.pdf]

# Supplemental Figure 7

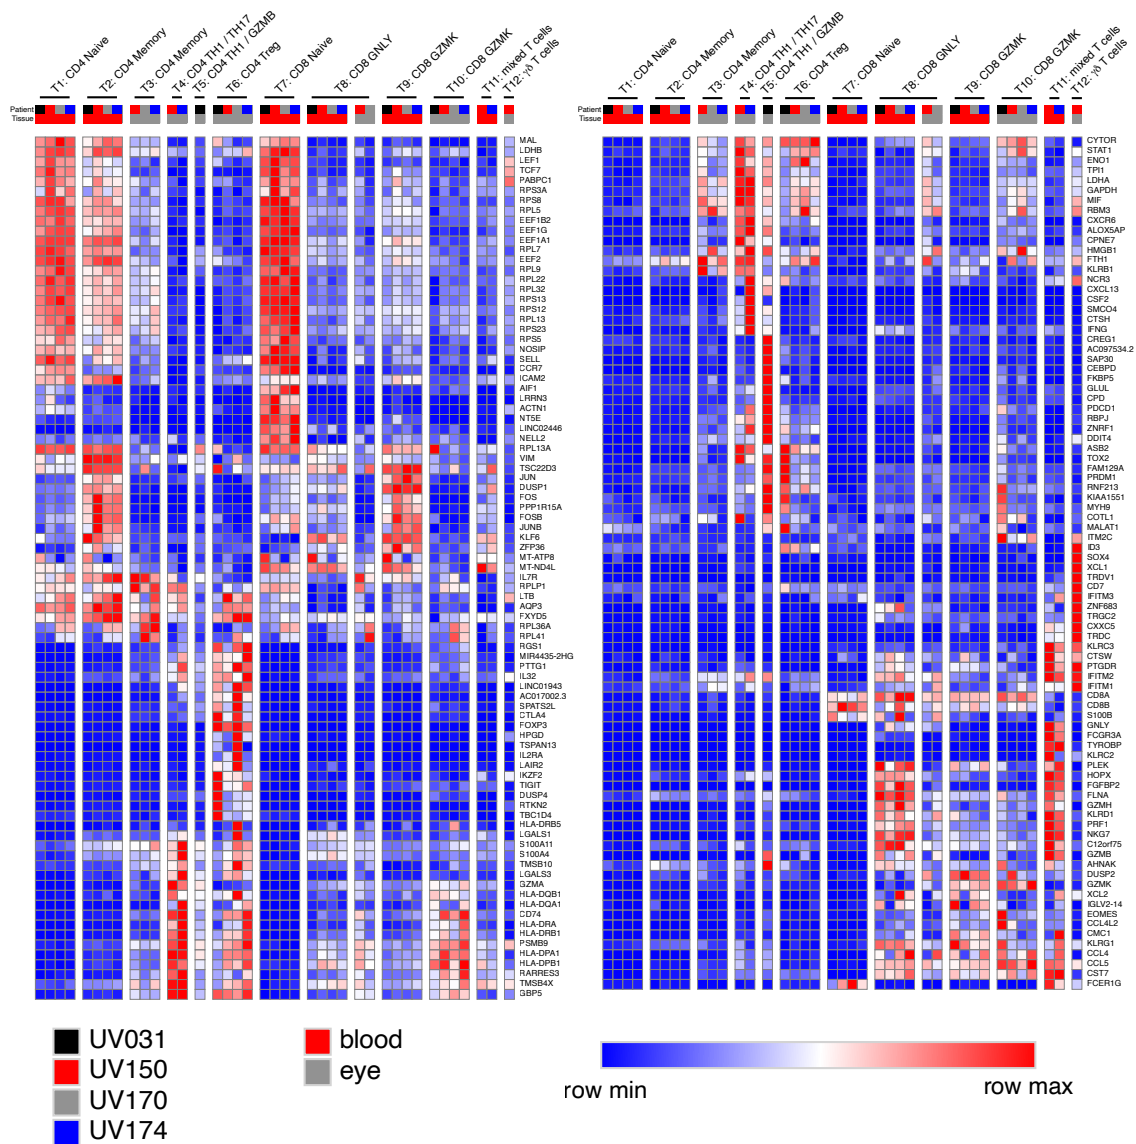

**Supplemental Figure 7: Expanded T cell cluster gene expression reveals shared and unique genes for each T cell cluster. Cluster-associated relative gene expression for indicated patient and tissue.**
