# Supplementary material
Source: PubMed Central journal article supplement (PMC9559912)
Supplement: mmc18.pdf [file mmc18.pdf]

Supplemental Figure 8

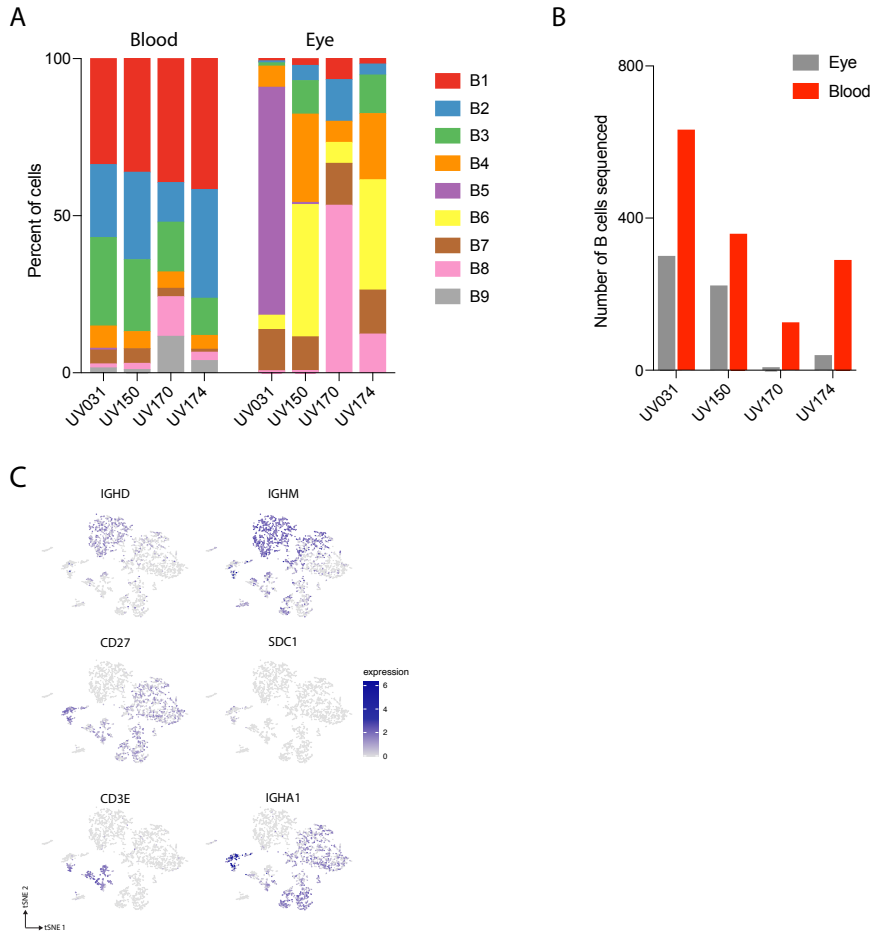

**Supplemental Figure 8: Patient-to-patient variation of ocular B cells is observed in B cell clustering and cellular abundance.** (A) Cluster abundance and raw cell count for blood and ocular B cells. Ocular cells found primarily in B4-B7. Patient variation of cluster frequency was greatest in the eye (B4-B7). (B) Number of B cells from each blood or eye sample. (C) Normalized expression of canonical B and T cell genes on a tSNE visualization, e.g. *IGHD* for naïve B cells, *CD27* for memory cells, and *SDC1* for plasmablasts.
