# Supplementary material
Source: PubMed Central journal article supplement (PMC9559912)
Supplement: mmc19.pdf [file mmc19.pdf]

# Supplemental Figure 9

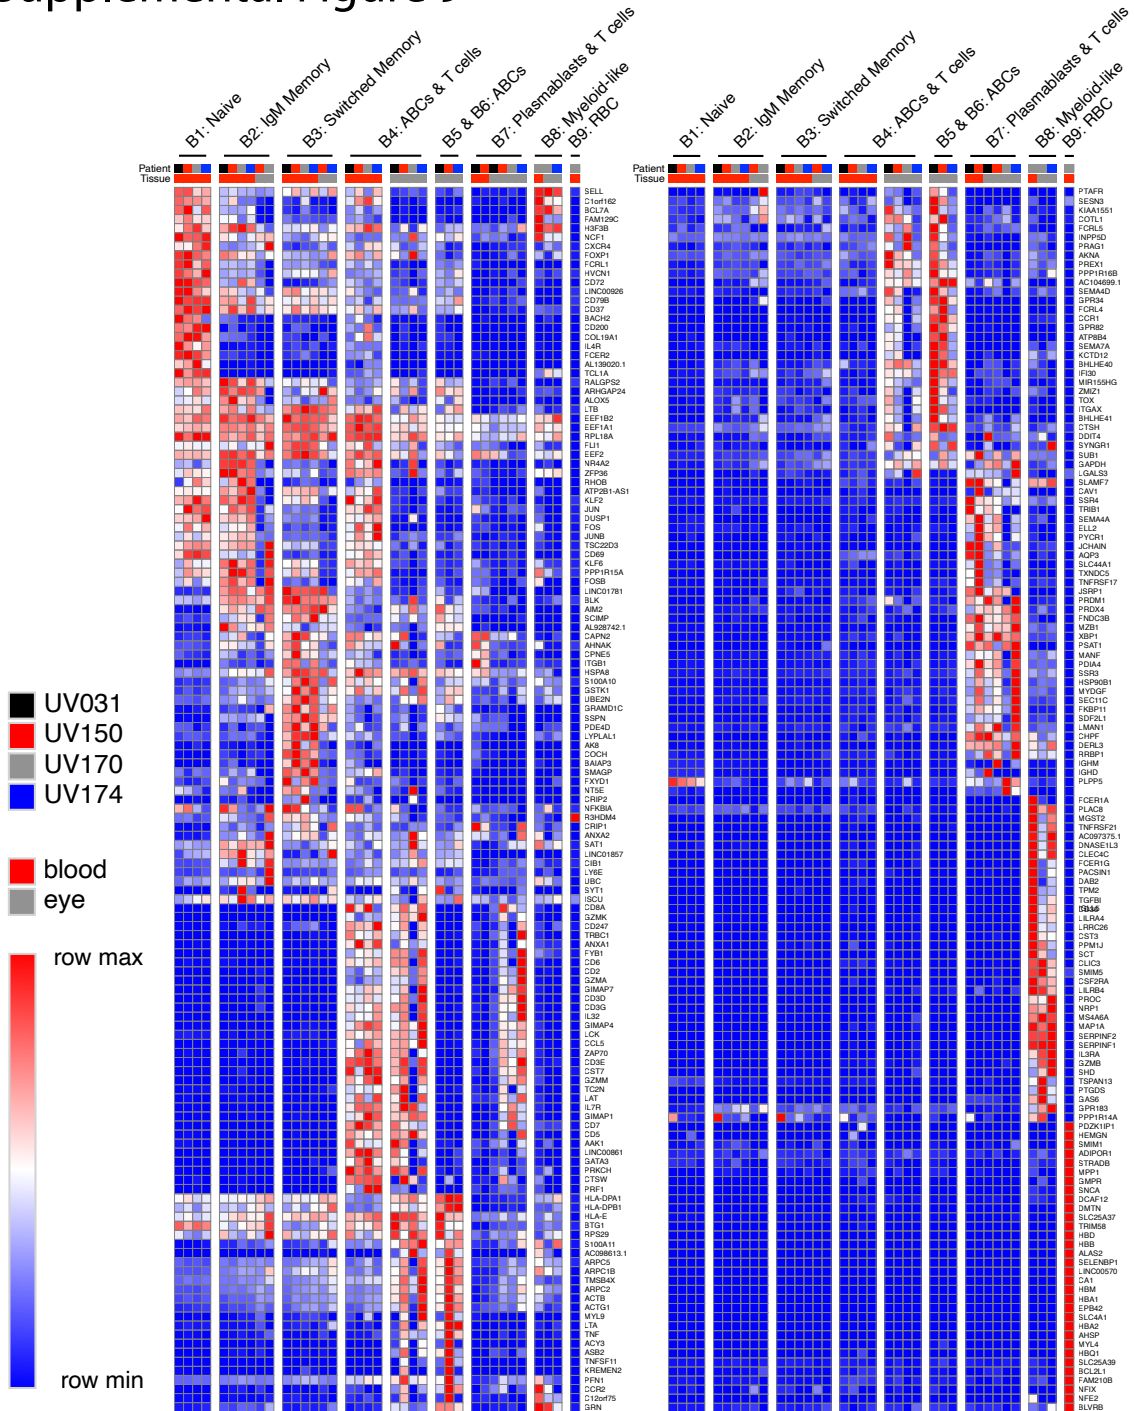

**Supplemental Figure 9: Expanded B cell cluster gene expression reveals shared and unique genes for each B cell cluster. Cluster-associated relative gene expression for indicated patient and tissue.**
