# Supplementary material
Source: PubMed Central journal article supplement (PMC9559912)
Supplement: mmc20.pdf [file mmc20.pdf]

## Supplemental Figure 10

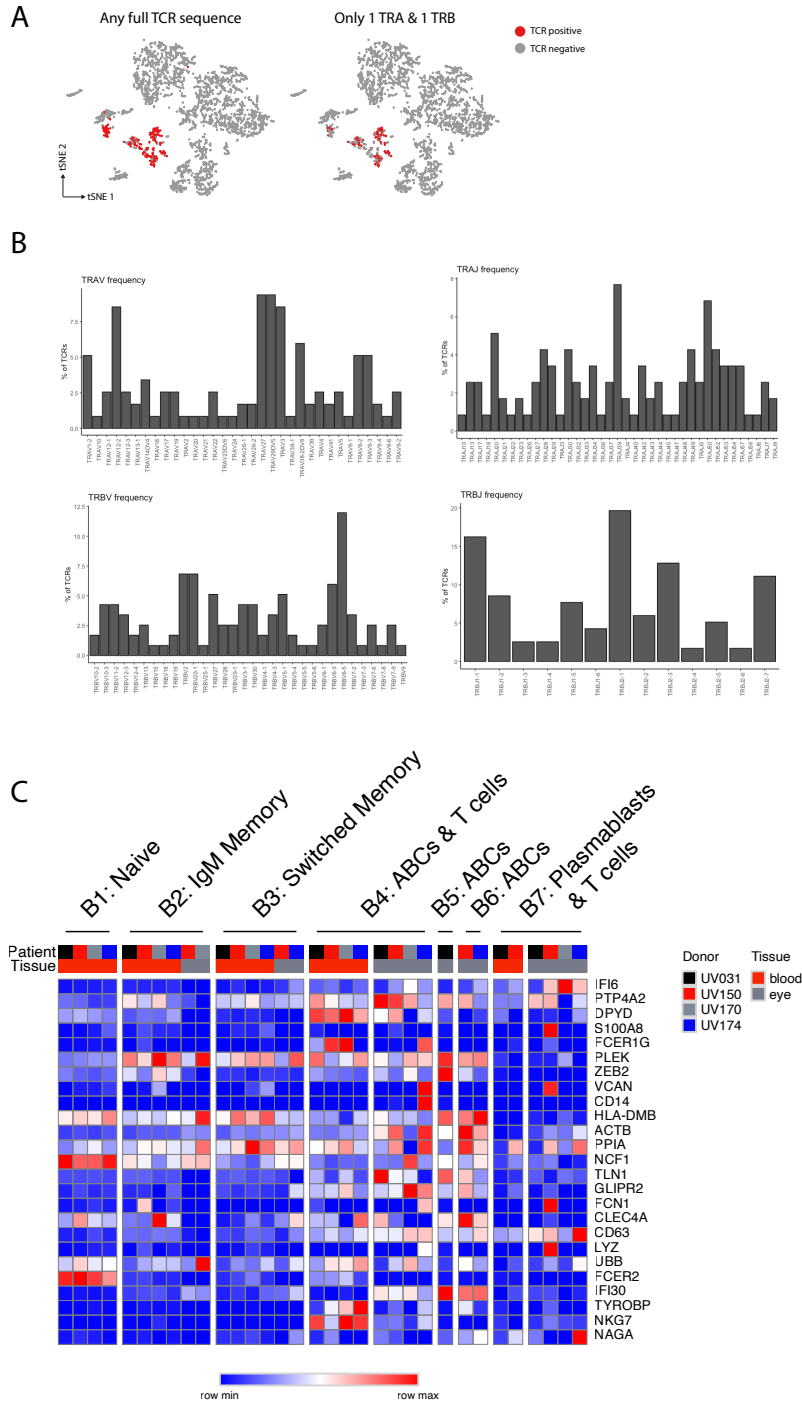

**Supplemental Figure 10: Co-expression of TCR and BCR within single cells and comparison with gene expression profile of previously described “double expresser” cells. (A)** TCR+BCR+ cells are overlaid in red on B cell tSNE plot (left panel all cells with TCR genes, right panel 117 cells that had only 1 TRA and 1 TRB). **(B)** Frequency of TRA and TRB chain usage amongst TCR+BCR+ cells. **(C)** Heatmap showing minimal enrichment of “double expresser” genes in clusters B4 & B7.
