# Supplementary material
Source: PubMed Central journal article supplement (PMC9559912)
Supplement: mmc21.pdf [file mmc21.pdf]

Supplemental Figure 11

Heavy Chain

| UV150          | IGH Class | IGH CDR3               |
|----------------|-----------|------------------------|
| Top Clonotype  | IGHM      | CARLRGYAMIVVPPALRYFDYW |
| Class-switched | IGHA1     | CARLRGYAMIVVPPALRYFDYW |

Light Chain

| UV150          | IGK CDR3   | IGL CDR3     |
|----------------|------------|--------------|
| Top Clonotype  | CQQYDNLITF | -            |
| Class-switched | CQQYDNLITF | CNSRDSSGNLVF |

**Supplemental Figure 11: Ocular B cells undergo class-switch recombination.** B cell receptor sequence information for the top expanded B cell clonotype (IgM) as well as one class-switched clonotype (IgA1).
